# Supplementary material for: DUX4 is a common driver of immune evasion and immunotherapy failure in metastatic cancers
Source: eLife. 2024 Jun 3;12:RP89017. doi: 10.7554/eLife.89017 (PMC11147511; doi:10.7554/eLife.89017)
Supplement: Supplementary file 1. — Hazard ratios, 95% confidence intervals, and p-values for patient covariates in the IMvigor210 urothelial carcinoma cohort, estimated under either the univariate or multivariate Cox Proportional Hazards model. Adjusted p-values were estimated via the Benjamini–Hochberg correction. [file elife-89017-supp1.xlsx]

## Sheet: Sheet1
Cox Proportional Hazards Regression for Overall Survival
	Univariate				Multivariatea,b
Characteristic	HR	95% CI	p-value	q-valuec	HR	95%CI	p-value	q-valuec
Tumor mutational burdend	0.43	0.28 - 0.66	1.10 x 10-4	6.62 x 10-4	0.14	0.07 - 0.30	2.88 x 10-7	3.46 x 10-6
DUX4 expression:
< 0.25 TPM (reference)	-	-	-	-	-	-	-	-
> 1 TPM	1.85	1.10 - 3.11	0.021	0.084	3.19	1.58 - 6.46	1.24 x 10-3	3.71 x 10-3
ECOG Performance Statuse:
0 (reference)	-	-	-	-	-	-	-	-
1	2.1	1.58 - 2.79	2.95 x 10-7	3.54 x 10-6	2.84	1.79 - 4.52	1.00 x 10-5	6.02 x 10-5
2	1.97	1.04 - 3.73	0.036	0.11	5.32	1.81 - 15.66	2.41 x 10-3	5.79 x 10-3
Received platinum:
No (reference)	-	-	-	-	-	-	-	-
Yes	1.41	1.01 - 1.98	0.047	0.11	2.78	1.52 - 5.08	9.19 x 10-4	3.67 x 10-3
Intravesical BCG administered:
No (reference)	-	-	-	-	-	-	-	-
Yes	0.98	0.73 - 1.32	0.89	0.92	0.61	0.37 - 1.01	0.054	0.08
Tobacco use history:
Never (reference)	-	-	-	-	-	-	-	-
Previous	0.9	0.68 - 1.19	0.45	0.67	1.2	0.78 - 1.86	0.41	0.41
Current	1.02	0.65 - 1.61	0.92	0.92	1.32	0.72 - 2.42	0.37	0.41
Stage:
I (reference)	-	-	-	-	-	-	-	-
II	0.96	0.69 - 1.35	0.83	0.92	1.6	0.62 - 0.94	0.082	0.11
III	1.23	0.86 - 1.75	0.25	0.44	1.74	1.05 - 2.90	0.033	0.056
IV	0.98	0.68 - 1.42	0.92	0.92	0.49	0.27 - 0.91	0.022	0.046
Sex:
Male (reference)	-	-	-	-	-	-	-	-
Female	1.23	0.91 - 1.66	0.18	0.36	0.81	0.51 - 1.29	0.37	0.41
aLog-rank test: p-value = 1.40 x 10-8
bAkaike Information Criterion = 970.78; Bayesian Information Criterion = 1003.08; Harrell’s Concordance Index = 0.70
cBenjamini-Hochberg FDR correction
dlog10(number of missense mutations)
eEastern Oncology Cooperative Group Performance Status
