# Supplementary material for: DUX4 is a common driver of immune evasion and immunotherapy failure in metastatic cancers
Source: eLife. 2024 Jun 3;12:RP89017. doi: 10.7554/eLife.89017 (PMC11147511; doi:10.7554/eLife.89017)
Supplement: Supplementary file 2. — As in Supplementary file 1, but TGFB1 expression is included in the models. [file elife-89017-supp2.xlsx]

## Sheet: Sheet1
Cox Proportional Hazards Regression for Overall Survival (TGFB1 expression included)
	Univariate				Multivariatea,b
Characteristic	HR	95% CI	p-value	q-valuec	HR	95%CI	p-value	q-valuec
Tumor mutational burdend	0.43	0.28 - 0.66	1.10 x 10-4	8.27 x 10-4	0.14	0.06 - 0.30	8.41 x 10-7	1.26 x 10-5
DUX4 expression:
< 0.25 TPM (reference)	-	-	-	-	-	-	-	-
> 1 TPM	1.85	1.10 - 3.11	0.021	0.079	3.12	1.52 - 6.38	1.87 x 10-3	7.01 x 10-3
ECOG Performance Statuse:
0 (reference)	-	-	-	-	-	-	-	-
1	2.1	1.58 - 2.79	2.95 x 10-7	4.43 x 10-6	2.86	1.79 - 4.57	1.18 x 10-5	8.84 x 10-5
2	1.97	1.04 - 3.73	0.036	0.091	5.31	1.79 - 15.7	2.58 x 10-3	7.73 x 10-3
Received platinum:
No (reference)	-	-	-	-	-	-	-	-
Yes	1.41	1.01 - 1.98	0.047	0.1	2.69	1.47 - 4.93	1.32 x 10-3	6.61 x 10-3
Intravesical BCG administered:
No (reference)	-	-	-	-	-	-	-	-
Yes	0.98	0.73 - 1.32	0.89	0.92	0.64	0.38 - 1.06	0.08	0.15
Tobacco use history:
Never (reference)	-	-	-	-	-	-	-	-
Previous	0.9	0.68 - 1.19	0.45	0.61	1.21	0.78 - 1.87	0.39	0.45
Current	1.02	0.65 - 1.61	0.92	0.92	1.43	0.76 - 2.67	0.27	0.36
Stage:
I (reference)	-	-	-	-	-	-	-	-
II	0.96	0.69 - 1.35	0.83	0.92	1.61	0.91 - 2.86	0.1	0.17
III	1.23	0.86 - 1.75	0.25	0.38	1.62	0.96 - 2.74	0.07	0.15
IV	0.98	0.68 - 1.42	0.92	0.92	0.46	0.24 - 0.88	0.02	0.05
Sex:
Male (reference)	-	-	-	-	-	-	-	-
Female	1.23	0.91 - 1.66	0.18	0.31	0.76	0.47 - 1.23	0.26	0.36
TGFB1 expression:
≤ 25th percentile (Q1, reference)	-	-	-	-	-	-	-	-
> 25th percentile and ≤ 50th percentile (Q2)	1.3	0.88 - 1.91	0.19	0.31	0.75	0.40 - 1.41	0.38	0.45
> 50th percentile and ≤ 75th percentile (Q3)	1.52	1.04 - 2.23	0.031	0.091	1.04	0.55 - 1.95	0.9	0.91
> 75th percentile (Q4)	1.68	1.16 - 2.45	6.46 x 10-3	0.032	0.96	0.50 - 1.87	0.91	0.91
aLog-rank test: p-value = 1.27 x 10-7
bAkaike Information Criterion = 975.30; Bayesian Information Criterion = 1015.67; Harrell’s Concordance Index = 0.71
cBenjamini-Hochberg FDR correction
dlog10(number of missense mutations)
eEastern Oncology Cooperative Group Performance Status
