# Supplementary material for: DUX4 is a common driver of immune evasion and immunotherapy failure in metastatic cancers
Source: eLife. 2024 Jun 3;12:RP89017. doi: 10.7554/eLife.89017 (PMC11147511; doi:10.7554/eLife.89017)
Supplement: Supplementary file 3. — Estimated p-values from the likelihood ratio test, comparing the goodness of fit of the specified competing models. [file elife-89017-supp3.xlsx]

## Sheet: Sheet1
Supplementary File 2. Likelihood ratio test
	Reduced models
	TMB only	TMB + clinicala
TMB + Clinicala + DUX4 expression	p = 1.08 x 10-6	p = 1.95 x 10-3
aEastern Cooperative Oncology Group Peformance Status + Platinum treatment history
